# Supplementary material for: γ-Irradiated Chitosan Mediates Enhanced Synthesis and Antimicrobial Properties of Chitosan–Silver (Ag) Nanocomposites
Source: PubMed Central journal article supplement — ACS Omega. 2021 Dec 10;6(50):34812–22. doi: 10.1021/acsomega.1c05358 (PMC8697400; doi:10.1021/acsomega.1c05358), 2021-12-10
Supplement: ao1c05358_si_001.pdf [file ao1c05358_si_001.pdf]

# $\gamma$ -Irradiated Chitosan Mediates Enhanced Synthesis and Antimicrobial Properties of Chitosan–Silver (Ag) Nanocomposites

Shriram Mirajkar,<sup>†,#</sup> Prakash Rathod,<sup>‡,∇</sup> Bharat Pawar,<sup>§</sup> Suprasanna Penna,<sup>||,⊥</sup> and  
Sunil Dalvi<sup>\*,†</sup>

<sup>†</sup>Plant Tissue Culture Section, Vasantdada Sugar Institute, Manjari (Bk.), Pune 412 307, India

<sup>‡</sup>Department of Chemistry, Savitribai Phule Pune University, Pune 411 007, India

<sup>§</sup>Plant Pathology Section, Vasantdada Sugar Institute, Manjari (Bk.), Pune 412 307, India

<sup>||</sup>Nuclear Agriculture and Biotechnology Division, Bhabha Atomic Research Centre, Trombay, Mumbai 400  
085, India

\*Email: [sgdalvi@gmail.com](mailto:sgdalvi@gmail.com), [sg.dalvi@vsisugar.org.in](mailto:sg.dalvi@vsisugar.org.in)

**Table S1.** Concentration gradient used for synthesis of chitosan-silver nano-composite

| Sr. no. | NL-CSN conc. (%) | AgNO <sub>3</sub> conc. (%) | Sr. no. | IR-CSN conc. (%) | AgNO <sub>3</sub> conc. (%) |
|---------|------------------|-----------------------------|---------|------------------|-----------------------------|
| 1       | 0.25             | 0.00                        | 13      | 0.25             | 0.00                        |
| 2       |                  | 0.05                        | 14      |                  | 0.05                        |
| 3       |                  | 0.10                        | 15      |                  | 0.10                        |
| 4       |                  | 0.15                        | 16      |                  | 0.15                        |
| 5       |                  | 0.20                        | 17      |                  | 0.20                        |
| 6       |                  | 0.25                        | 18      |                  | 0.25                        |
| 7       | 0.00             | 0.25                        | 19      | 0.00             | 0.25                        |
| 8       | 0.05             |                             | 20      | 0.05             |                             |
| 9       | 0.10             |                             | 21      | 0.10             |                             |
| 10      | 0.15             |                             | 22      | 0.15             |                             |
| 11      | 0.20             |                             | 23      | 0.20             |                             |
| 12      | 0.25             |                             | 24      | 0.25             |                             |
